# Supplementary material for: Child and maternal health outcomes following antenatal exposure to classic psychedelic substances: a systematic review
Source: Research Square preprint supplement (doi:10.21203/rs.3.rs-9732799/v1), 2026-05-19
Supplement: Supplementary file 1 [file 59492820e91fc596ade0240c.docx]

**Supplement 1**

**eTable 1. PRISMA checklist**

| **Section and topic** | **Item** | **Checklist item** | **Page** |
| --- | --- | --- | --- |
| ***TITLE*** | | | |
| Title | 1 | Identify the report as a systematic review | 1 |
| ***ABSTRACT*** | | | |
| Abstract | 2 | See the PRISMA 2020 for Abstracts checklist | 3-4 |
| ***INTRODUCTION*** | | | |
| Rationale | 3 | Describe the rationale for the review in the context of existing knowledge | 5 |
| Objectives | 4 | Provide an explicit statement of the objective(s) or question(s) the review addresses | 5 |
| ***METHODS*** | | | |
| Eligibility criteria | 5 | Specify the inclusion and exclusion criteria for the review and how studies were grouped for the syntheses. | 6 |
| Information sources | 6 | Specify all databases, registers, websites, organisations, reference lists and other sources searched or consulted to identify studies. Specify the date when each source was last searched or consulted. | 6 |
| Search strategy | 7 | Present the full search strategies for all databases, registers and websites, including any filters and limits used. | 6, eTable2 |
| Selection process | 8 | Specify the methods used to decide whether a study met the inclusion criteria of the review, including how many reviewers screened each record and each report retrieved, whether they worked independently, and if applicable, details of automation tools used in the process. | 7 |
| Data collection process | 9 | Specify the methods used to collect data from reports, including how many reviewers collected data from each report, whether they worked independently, any processes for obtaining or confirming data from study investigators, and if applicable, details of automation tools used in the process. | 7 |
| Data items | 10a | List and define all outcomes for which data were sought. Specify whether all results that were compatible with each outcome domain in each study were sought (e.g. for all measures, time points, analyses), and if not, the methods used to decide which results to collect. | 7 |
| 10b | List and define all other variables for which data were sought (e.g. participant and intervention characteristics, funding sources). Describe any assumptions made about any missing or unclear information. | 7 |
| Study risk of bias | 11 | Specify the methods used to assess risk of bias in the included studies, including details of the tool(s) used, how many reviewers assessed each study and whether they worked independently, and if applicable, details of automation tools used in the process. | 7-8 |
| Effect measures | 12 | Specify for each outcome the effect measure(s) (e.g. risk ratio, mean difference) used in the synthesis or presentation of results. | N/A |
| Synthesis methods | 13a | Describe the processes used to decide which studies were eligible for each synthesis (e.g. tabulating the study intervention characteristics and comparing against the planned groups for each synthesis (item #5)). | 7 |
| 13b | Describe any methods required to prepare the data for presentation or synthesis, such as handling of missing summary statistics, or data conversions. | N/A |
| 13c | Describe any methods used to tabulate or visually display results of individual studies and syntheses. | 7-8 |
| 13d | Describe any methods used to synthesize results and provide a rationale for the choice(s). If meta-analysis was performed, describe the model(s), method(s) to identify the presence and extent of statistical heterogeneity, and software package(s) used. | 8 |
| 13e | Describe any methods used to explore possible causes of heterogeneity among study results (e.g. subgroup analysis, meta-regression). | N/A |
| 13f | Describe any sensitivity analyses conducted to assess robustness of the synthesized results. | N/A |
| Reporting bias assessment | 14 | Describe any methods used to assess risk of bias due to missing results in a synthesis (arising from reporting biases). | N/A |
| Certainty assessment | 15 | Describe any methods used to assess certainty (or confidence) in the body of evidence for an outcome. | 7 |
| ***RESULTS*** | | | |
| Study selection | 16a | Describe the results of the search and selection process, from the number of records identified in the search to the number of studies included in the review, ideally using a flow diagram. | 8-9 |
| 16b | Cite studies that might appear to meet the inclusion criteria, but which were excluded, and explain why they were excluded. | N/A |
| Study characteristics | 17 | Cite each included study and present its characteristics. | 8-9, Table 1 |
| Risk of bias in studies | 18 | Present assessments of risk of bias for each included study. | eTable 4 |
| Results of individual studies | 19 | For all outcomes, present, for each study: (a) summary statistics for each group (where appropriate) and (b) an effect estimate and its precision (e.g. confidence/credible interval), ideally using structured tables or plots. | 13-16 |
| Results of syntheses | 20a | For each synthesis, briefly summarise the characteristics and risk of bias among contributing studies. | 13-16, Table 1, eTable 5, eTable 6 |
| 20b | Present results of all statistical syntheses conducted. If meta-analysis was done, present for each the summary estimate and its precision (e.g. confidence/credible interval) and measures of statistical heterogeneity. If comparing groups, describe the direction of the effect. | N/A |
| 20c | Present results of all investigations of possible causes of heterogeneity among study results. | N/A |
| 20d | Present results of all sensitivity analyses conducted to assess the robustness of the synthesized results. | N/A |
| Reporting biases | 21 | Present assessments of risk of bias due to missing results (arising from reporting biases) for each synthesis assessed. | N/A |
| Certainty of evidence | 22 | Present assessments of certainty (or confidence) in the body of evidence for each outcome assessed. | eTable 5 |
| ***DISCUSSION*** | | | |
| Discussion | 23a | Provide a general interpretation of the results in the context of other evidence. | 16-17 |
| 23b | Discuss any limitations of the evidence included in the review. | 16-18 |
| 23c | Discuss any limitations of the review processes used. | 16-18 |
| 23d | Discuss implications of the results for practice, policy, and future research. | 18-19 |
| ***OTHER INFORMATION*** | | | |
| Registration and protocol | 24a | Provide registration information for the review, including register name and registration number, or state that the review was not registered. | 6 |
| 24b | Indicate where the review protocol can be accessed, or state that a protocol was not prepared. | 6 |
| 24c | Describe and explain any amendments to information provided at registration or in the protocol. | 6 |
| Support | 25 | Describe sources of financial or non-financial support for the review, and the role of the funders or sponsors in the review. | 20-21 |
| Competing interests | 26 | Declare any competing interests of review authors. | 20-21 |
| Availability of data, code and other materials | 27 | Report which of the following are publicly available and where they can be found: template data collection forms; data extracted from included studies; data used for all analyses; analytic code; any other materials used in the review. | 20 |

**eTable 2.** **Full search strategy**

**1. Medline**

| Interface: **Ovid MEDLINE(R) ALL** content coverage from 1946  Date of Search: 17 July 2025  Number of hits: 1357  Comment: In Ovid, two or more words are automatically searched as phrases; i.e. no quotation marks are needed | Field labels   - exp/ = exploded MeSH term - / = non exploded MeSH term - .ti,ab,kf. = title, abstract and author keywords - adjx = within x words, regardless of order - * = truncation of word for alternate endings - ? = 0-1 letter/number - # = 1 letter/number |
| --- | --- |

| **#** | **Searches** | **Results** |
| --- | --- | --- |
| 1 | exp Pregnancy/ | 1063662 |
| 2 | exp Prenatal Care/ | 34819 |
| 3 | (pregnan* or uter* or antenatal or antepartum or prenatal or maternal or trimester or gestation* or gravid*).ti,ab,kf. | 1181929 |
| 4 | 1 or 2 or 3 | 1562593 |
| 5 | exp Hallucinogens/ | 30531 |
| 6 | exp Psilocybin/ | 1560 |
| 7 | exp Psilocybe/ | 84 |
| 8 | exp Banisteriopsis/ | 316 |
| 9 | exp N,N-Dimethyltryptamine/ | 943 |
| 10 | exp Lysergic Acid Diethylamide/ | 5268 |
| 11 | exp Mescaline/ | 1084 |
| 12 | (psychedelic* or hallucinogen* or entheogen* or psychotomim* or psilocybin or psilocin or dimethyltryptamine or magic mushroom* or ayahuasca or hoasca or banisteriopsis caapi or psychotria viridis or caapi or yage or chacruna or DMT or N,N-Dimethyltryptamine or LSD or lysergic acid diethylamide or lysergide or mescalin* or trimethoxyphenethylamine* or TMPEA or peyote or lophophora williamsii or San Pedro or echinopsis pachanoi or echinopsis peruviana or peruvian torch or trichocereus peruvianus or trichocereus macrogonus).ti,ab,kf. | 22030 |
| 13 | 5 or 6 or 7 or 8 or 9 or 10 or 11 or 12 | 43930 |
| 14 | 4 and 13 | 1357 |

**2. Embase**

| Interface: **embase.com** content coverage from 1947  Date of Search: 17 July 2025  Number of hits: 1,228  Comment: Emtree is the controlled vocabulary in Embase | Field labels   - /exp = exploded Emtree term - /de = non exploded Emtree term - ti,ab,kw = title, abstract and author keywords - NEAR/x = within x words, regardless of order - * = truncation of word for alternate endings - $ = 0-1 letter/number - ? = 1 letter/number |
| --- | --- |

| **#** | **Searches** | **Results** |
| --- | --- | --- |
| 1 | 'pregnancy'/exp | 964,121 |
| 2 | 'prenatal care'/exp | 202,813 |
| 3 | pregnan*:ti,ab,kw OR uter*:ti,ab,kw OR antenatal:ti,ab,kw OR antepartum:ti,ab,kw OR prenatal:ti,ab,kw OR maternal:ti,ab,kw OR trimester:ti,ab,kw OR gestation*:ti,ab,kw OR gravid*:ti,ab,kw | 1,578,128 |
| 4 | #1 OR #2 OR #3 | 1,879,160 |
| 5 | 'psilocybine'/exp | 4,071 |
| 6 | 'psilocin'/exp | 671 |
| 7 | 'banisteriopsis'/exp | 351 |
| 8 | 'banisteriopsis caapi'/exp | 193 |
| 9 | 'dimethyltryptamine'/exp | 1,437 |
| 10 | 'lysergide'/exp | 11,609 |
| 11 | 'mescaline'/exp | 2,445 |
| 12 | psychedelic*:ti,ab,kw OR hallucinogen*:ti,ab,kw OR entheogen*:ti,ab,kw OR psychotomim*:ti,ab,kw OR psilocybin:ti,ab,kw OR psilocin:ti,ab,kw OR dimethyltryptamine:ti,ab,kw OR ‘magic mushroom*’:ti,ab,kw OR ayahuasca:ti,ab,kw OR hoasca:ti,ab,kw OR ‘banisteriopsis caapi’:ti,ab,kw OR ‘psychotria viridis’:ti,ab,kw OR caapi:ti,ab,kw OR yage:ti,ab,kw OR chacruna:ti,ab,kw OR dmt:ti,ab,kw OR ‘n,n-dimethyltryptamine’:ti,ab,kw OR lsd:ti,ab,kw OR ‘lysergic acid diethylamide’:ti,ab,kw OR lysergide:ti,ab,kw OR mescalin*:ti,ab,kw OR trimethoxyphenethylamine*:ti,ab,kw OR tmpea:ti,ab,kw OR peyote:ti,ab,kw OR ‘lophophora williamsii’:ti,ab,kw OR ‘san pedro’:ti,ab,kw OR ‘echinopsis pachanoi’:ti,ab,kw OR ‘echinopsis peruviana’:ti,ab,kw OR ‘peruvian torch’:ti,ab,kw OR ‘trichocereus peruvianus’:ti,ab,kw OR ‘trichocereus macrogonus’:ti,ab,kw | 32,071 |
| 13 | #5 OR #6 OR #7 OR #8 OR #9 OR #10 OR #11 OR #12 | 37,990 |
| 14 | #4 AND #13 | 1,228 |

**3. Web of Science Core Collection**

| Interface: **Clarivate Analytics**  Editions and content coverage years= A&HCI - 1975 , ESCI -2019 , SCI-EXPANDED - 1945 , SSCI - 1945  Date of Search: 17 July 2025  Number of hits: 486 | Field labels   - TS/Topic = title, abstract, author keywords and Keywords Plus - TI= title - AB = abstract - AK = author keywords - NEAR/x = within x words, regardless of order - * = truncation of word for alternate endings - $ = 0-1 letter/number - ? = 1 letter/number   Note: the *Exact search*-function was used for all the searches |
| --- | --- |

| **#** | **Searches** | **Results** |
| --- | --- | --- |
| #1 | TS=((pregnan* or uter* or antenatal or antepartum or prenatal or maternal or trimester or gestation* or gravid*)) | 1,336,962 |
| #2 | TS=((psychedelic* or hallucinogen* or entheogen* or psychotomim* or psilocybin or psilocin or dimethyltryptamine or “magic mushroom*” or ayahuasca or hoasca or “banisteriopsis caapi” or “psychotria viridis” or caapi or yage or chacruna or DMT or “N,N-Dimethyltryptamine” or LSD or “lysergic acid diethylamide” or lysergide or mescalin* or trimethoxyphenethylamine* or TMPEA or peyote or “lophophora williamsii” or “San Pedro” or “echinopsis pachanoi” or “echinopsis peruviana” or “peruvian torch” or “trichocereus peruvianus” or “trichocereus macrogonus”)) | 33,323 |
| #4 | #1 AND #2 | 486 |

**4. PsycInfo**

| Interface: **EBSCOhost** - conctent coverage from 1806  Date of Search: 17 July 2025  Number of hits: 110 | Field labels   - DE = subject heading - TI = title - AB = abstract - KW = author keywords - XB = title, abstract - Nx = within x words, regardless of order - * = truncation of word for alternate endings - # = 0-1 letter/number - ? = 1 letter/number   Note: sometimes “quotation marks” are needed for single search terms to avoid automatic term mapping (lemmatization) |
| --- | --- |

| **#** | **Searches** | **Results** |
| --- | --- | --- |
| S1 | DE "Pregnancy" OR DE "Pregnancy Outcomes" | 57,179 |
| S2 | DE "Prenatal Care" | 4,332 |
| S3 | XB ( (pregnan* or uter* or antenatal or antepartum or prenatal or maternal or trimester or gestation* or gravid*) ) OR KW ( (pregnan* or uter* or antenatal or antepartum or prenatal or maternal or trimester or gestation* or gravid*) ) | 136,024 |
| S4 | S1 OR S2 OR S3 | 146,271 |
| S5 | DE "Psychedelic Drugs" OR DE "Lysergic Acid Diethylamide" OR DE "Mescaline" OR DE "Peyote" OR DE "Psilocybin" | 4,754 |
| S6 | XB ( (psychedelic* or hallucinogen* or entheogen* or psychotomim* or psilocybin or psilocin or dimethyltryptamine or “magic mushroom*” or ayahuasca or hoasca or “banisteriopsis caapi” or “psychotria viridis” or caapi or yage or chacruna or DMT or “N,N-Dimethyltryptamine” or LSD or “lysergic acid diethylamide” or lysergide or mescalin* or trimethoxyphenethylamine* or TMPEA or peyote or “lophophora williamsii” or “San Pedro” or “echinopsis pachanoi” or “echinopsis peruviana” or “peruvian torch” or “trichocereus peruvianus” or “trichocereus macrogonus”) ) OR KW ( (psychedelic* or hallucinogen* or entheogen* or psychotomim* or psilocybin or psilocin or dimethyltryptamine or “magic mushroom*” or ayahuasca or hoasca or “banisteriopsis caapi” or “psychotria viridis” or caapi or yage or chacruna or DMT or “N,N-Dimethyltryptamine” or LSD or “lysergic acid diethylamide” or lysergide or mescalin* or trimethoxyphenethylamine* or TMPEA or peyote or “lophophora williamsii” or “San Pedro” or “echinopsis pachanoi” or “echinopsis peruviana” or “peruvian torch” or “trichocereus peruvianus” or “trichocereus macrogonus”) ) | 9,823 |
| S7 | S5 OR S6 | 10,234 |
| S8 | S4 AND S7 | 110 |

**5. Cochrane Central Register of Controlled Trials (CENTRAL)**

| Interface: **Cochrane Library**  Date of Search: 17 July 2025  Number of hits: 83 | Field labels   - .ti,ab,kw = title, abstract and keywords - * = truncation of word for alternate endings |
| --- | --- |

| **#** | **Searches** | **Results** |
| --- | --- | --- |
| #1 | MeSH descriptor: [Pregnancy] explode all trees | 33594 |
| #2 | MeSH descriptor: [Prenatal Care] explode all trees | 2340 |
| #3 | (pregnan* or uter* or antenatal or antepartum or prenatal or maternal or trimester or gestation* or gravid*):ti,ab,kw | 131740 |
| #4 | #1 OR #2 OR #3 | 131908 |
| #5 | MeSH descriptor: [Hallucinogens] explode all trees | 490 |
| #5 | MeSH descriptor: [Hallucinogens] explode all trees | 490 |
| #6 | MeSH descriptor: [Banisteriopsis] explode all trees | 29 |
| #7 | MeSH descriptor: [Lysergic Acid Diethylamide] explode all trees | 158 |
| #8 | MeSH descriptor: [Mescaline] explode all trees | 11 |
| #9 | MeSH descriptor: [Psilocybin] explode all trees | 260 |
| #10 | (psychedelic* or hallucinogen* or entheogen* or psychotomim* or psilocybin or psilocin or dimethyltryptamine or “magic mushroom” or "magic mushrooms" or ayahuasca or hoasca or “banisteriopsis caapi” or “psychotria viridis” or caapi or yage or chacruna or DMT or “N,N-Dimethyltryptamine” or LSD or “lysergic acid diethylamide” or lysergide or mescalin* or trimethoxyphenethylamine* or TMPEA or peyote or “lophophora williamsii” or “San Pedro” or “echinopsis pachanoi” or “echinopsis peruviana” or “peruvian torch” or “trichocereus peruvianus” or “trichocereus macrogonus”):ti,ab,kw | 2468 |
| #11 | #5 OR #6 OR #7 OR #8 OR #9 OR #10 | 2468 |
| #12 | #4 AND #11 | 83 |

**eTable 3. Data extraction template**

| **Data extraction item** | **Additional information** |
| --- | --- |
| ***General information*** | |
| Covidence number | Automatic in Covidence |
| Study ID | Automatic in Covidence |
| Title | Automatic in Covidence |
| Reviewer name | Free text |
| Year of publication | e.g. 2005 |
| Funding | Description |
| Country | e.g. Ethiopia |
| Geographic region | Asia, Africa, Europe, North America, South America |
| Study design | Case report, case series, cross-sectional, cohort study, RCT, other trial design, other study design |
| Study start and end years | e.g. 2020-2024 |
| Data source | e.g. National Health Survey database |
| ***Population*** | |
| Study population | Information about the pregnancy, e.g. singleton |
| Sample size | Total number of study participants |
| Mean age in years | If missing, input “999” |
| Median age in years | If missing, input “999” |
| Women in age group category ≥35 years | As n (%), e.g. 120 (25%) |
| ***Exposure*** | |
| Substance exposure during pregnancy | e.g. psilocybin, LSD |
| Dose | Description |
| Other substance use | i.e. yes, no |
| If yes, which substances | e.g. alcohol, smoking, opioids, amphetamines, cannabis |
| Ascertainment of exposure | Objective, self-reported, other |
| Pregnancy trimester | i.e. prior to pregnancy, first, second, third |
| Context of exposure | i.e. medical, non-medical context |
| Mother was aware of pregnancy at the time of exposure | i.e. yes, no, not reported |
| ***Comparison*** | |
| Was there a comparison/control? | Yes, no |
| If yes, provide description | i.e. control population, number of participants in control group |
| ***Outcome*** | |
| Spontaneous abortion (miscarriage) | Free text |
| Stillbirth | Free text |
| Neonatal mortality | Free text |
| Preterm birth | Free text |
| Low birthweight | Free text |
| Small for gestational age | Free text |
| Congenital malformation | Free text |
| Other reported outcomes | Free text |
| Study conclusion | Free text |

**eTable 4a. Risk of bias assessment using the Joanna Briggs Institute (JBI) critical appraisal tool for case reports**

Scoring: Yes = 1 point; No/Unclear/NA = 0 points. Rating: 7-8 points = low risk of bias; 5-6 = moderate risk of bias; <5 = high risk of bias.

| Study ID | 1. Were patient’s demographic characteristics clearly described? | 2. Was the patient’s history clearly described and presented as a timeline? | 3. Was the current clinical condition of the patient on presentation clearly described? | 4. Were diagnostic tests or methods and the results clearly described? | 5. Was the intervention(s) or treatment procedure(s) clearly described? | 6. Was the post-intervention clinical condition clearly described? | 7. Were adverse events (harms) or unanticipated events identified and described? | CR 8. Does the case report provide takeaway lessons? | Total |
| --- | --- | --- | --- | --- | --- | --- | --- | --- | --- |
| Aleguas 2015 | x | x | ✓ | ✓ | ✓ | ? | ✓ | ✓ | 5 |
| Apple 1974 | ✓ | x | ✓ | ✓ | N/A | N/A | ✓ | ✓ | 5 |
| Assemany 1970 | ✓ | ✓ | ✓ | ✓ | N/A | N/A | ✓ | ✓ | 6 |
| Bogdanoff 1972 | ✓ | ✓ | ✓ | ✓ | ✓ | ✓ | ✓ | ✓ | 8 |
| Carakushansky 1969 | ✓ | ✓ | ✓ | ✓ | N/A | N/A | ✓ | ✓ | 6 |
| Chan 1978 | ? | ✓ | ✓ | ✓ | N/A | N/A | ✓ | ✓ | 5 |
| Eller 1970 | ✓ | ✓ | ✓ | ✓ | ✓ | ✓ | ✓ | ✓ | 8 |
| Faria 1973 | x | ✓ | ✓ | ✓ | N/A | N/A | ✓ | ✓ | 5 |
| Gelehrter 1970 | ✓ | ✓ | ✓ | ✓ | ✓ | ✓ | ✓ | ✓ | 8 |
| Giovannucci 1976 | ✓ | ✓ | ✓ | ✓ | N/A | N/A | ✓ | ✓ | 6 |
| Haden 2020 | x | ✓ | ✓ | N/A | N/A | N/A | ✓ | ✓ | 4 |
| Jeanbart 1971 | ✓ | ✓ | ✓ | ✓ | N/A | N/A | ✓ | ✓ | 6 |
| Kelly 2000 | ? | ? | x | x | N/A | N/A | ? | ✓ | 1 |
| Margolis 1980 | ✓ | ✓ | ✓ | ✓ | ✓ | N/A | ✓ | ✓ | 7 |
| Sato 1968 | ✓ | ✓ | ✓ | ✓ | N/A | N/A | N/A | ✓ | 5 |
| Scott 2010 | ✓ | ✓ | ✓ | ✓ | ✓ | ✓ | ✓ | ✓ | 8 |
| Stenchever 1970 | x | x | x | ✓ | N/A | N/A | N/A | ✓ | 2 |
| Tenbrinck 1975 | ? | ✓ | ✓ | ✓ | ✓ | ✓ | ✓ | ? | 6 |
| Tenorio 1988 | ? | ✓ | ✓ | ✓ | ✓ | ✓ | ✓ | ✓ | 7 |
| Van Tol 2009 | ✓ | ✓ | ✓ | ✓ | ✓ | ✓ | ✓ | ✓ | 8 |
| Von Mandach 1999 | ✓ | ✓ | ✓ | ✓ | N/A | N/A | N/A | ✓ | 5 |
| Warren 1970 | ✓ | ✓ | ✓ | ✓ | N/A | N/A | N/A | ✓ | 5 |
| Zellweger 1967 | ✓ | ✓ | ✓ | ✓ | N/A | N/A | ✓ | ✓ | 6 |

**eTable 4b. Risk of bias assessment using the JBI critical appraisal tool for case series**

Scoring: Yes = 1 point; No/Unclear/NA = 0 points. Rating: 8-10 points = low risk of bias; 6-7 = moderate risk of bias; <6 = high risk of bias.

| Study ID | 1. Were there clear criteria for inclusion in the case series? | 2. Was the condition measured in a standard, reliable way for all participants included in the case series? | 3. Were valid methods used for identification of the condition for all participants included in the case series? | 4. Did the case series have consecutive inclusion of participants? | 5. Did the case series have complete inclusion of participants? | 6. Was there clear reporting of the demographics of the participants in the study? | 7. Was there clear reporting of clinical information of the participants? | 8. Were the outcomes or follow-up results of cases clearly reported? | 9. Was there clear reporting of the presenting site(s)/clinic(s) demographic information? | 10. Was statistical analysis appropriate? | Total |
| --- | --- | --- | --- | --- | --- | --- | --- | --- | --- | --- | --- |
| Carter 1972 | ? | ? | ? | ? | ? | x | ✓ | ✓ | ? | N/A | 2 |
| Cohen 1967 | ✓ | ✓ | ? | ? | ? | x | x | ✓ | ✓ | N/A | 4 |
| Hirschhorn 1968 | ✓ | ? | ✓ | ✓ | ✓ | x | ✓ | ✓ | x | N/A | 6 |
| Hoyt 1978 | x | ? | ✓ | ? | ? | x | ✓ | ✓ | x | N/A | 3 |

**eTable 4c. Risk of bias assessment using the JBI critical appraisal tool for cross-sectional studies**

Scoring: Yes = 1 point; No/Unclear/NA = 0 points. Rating: 78 points = low risk of bias; 5-6 = moderate risk of bias; <5 = high risk of bias.

| Study ID | 1. Were the criteria for inclusion in the sample clearly defined? | 2. Were the study subjects and the setting described in detail? | 3. Was the exposure measured in a valid and reliable way? | 4. Were objective, standard criteria used for measurement of the condition? | 5. Were confounding factors identified? | 6. Were strategies to deal with confounding factors stated? | 7. Were the outcomes measured in a valid and reliable way? | 8. Was appropriate statistical analysis used? | Total |
| --- | --- | --- | --- | --- | --- | --- | --- | --- | --- |
| Egozcue 1969 | ✓ | ✓ | ? | ✓ | x | x | ✓ | ✓ | 5 |
| Ho 2001 | ✓ | ✓ | ✓ | ✓ | x | x | ✓ | ✓ | 6 |

**eTable 4d. Risk of bias assessment using the JBI critical appraisal tool for case-control studies**

Scoring: Yes = 1 point; No/Unclear/NA = 0 points. Rating: 8-10 points = low risk of bias; 6-7 = moderate risk of bias; <6 = high risk of bias.

| Study ID | Were the groups comparable other than presence of disease in cases or absence of disease in controls? | Were cases and controls matched appropriately? | 3. Were the same criteria used for identification of cases and controls? | 4. Was exposure measured in a standard, valid and reliable way? | 5. Was exposure measured in the same way for cases and controls? | 6. Were confounding factors identified? | 7. Were strategies to deal with confounding factors stated? | 8. Were outcomes assessed in a standard, valid and reliable way for cases and controls? | 9. Was the exposure period of interest long enough to be meaningful? | 10. Was appropriate statistical analysis used? | Total |
| --- | --- | --- | --- | --- | --- | --- | --- | --- | --- | --- | --- |
| Torfs 1994 | ✓ | ✓ | ✓ | ✓ | ✓ | ✓ | ✓ | ✓ | ✓ | ✓ | 10 |

**eTable 4e. Risk of bias assessment using the JBI critical appraisal tool for cohort studies**

Scoring: Yes = 1 point; No/Unclear/NA = 0 points. Rating: 9-11 points = low risk of bias; 6-8 = moderate risk of bias; <6 = high risk of bias.

| Study ID | 1. Were the two groups similar and recruited from the same population? | 2. Were the exposures measured similarly to assign people to both exposed and unexposed groups? | 3. Was the exposure measured in a valid and reliable way? | 4. Were confounding factors identified? | 5. Were strategies to deal with confounding factors stated? | 6. Were the groups/participants free of the outcome at the start of the study (or at the moment of exposure)? | 7. Were the outcomes measured in a valid and reliable way? | 8. Was the follow up time reported and sufficient to be long enough for outcomes to occur? | 9. Was follow up complete, and if not, were the reasons to loss to follow up described and explored? | 10. Were strategies to address incomplete follow up utilized? | 11. Was appropriate statistical analysis used? | Total |
| --- | --- | --- | --- | --- | --- | --- | --- | --- | --- | --- | --- | --- |
| Aase 1970 | ✓ | ✓ | ✓ | ✓ | ✓ | ✓ | ✓ | ✓ | ✓ | N/A | ✓ | 10 |
| Cohen 1968 | ✓ | ✓ | ? | x | x | ? | ✓ | ✓ | N/A | N/A | N/A | 4 |
| Egozcue 1968 | x | ✓ | ✓ | x | N/A | ? | ✓ | ✓ | N/A | N/A | ✓ | 5 |
| Gomez-Ruiz 2022 | ✓ | ✓ | ✓ | x | x | ✓ | ✓ | ✓ | ? | ? | ✓ | 7 |
| Jacobson 1972 | N/A | N/A | ✓ | ✓ | x | N/A | ✓ | ✓ | ? | N/A | ? | 4 |
| McElhatton 1999 | ✓ | ✓ | ? | x | N/A | ? | ✓ | ✓ | N/A | N/A | ✓ | 5 |
| McGlothlin 1970 | ✓ | ✓ | ✓ | N/A | N/A | N/A | ✓ | ✓ | x | x | N/A | 5 |
| Moore 2010 | ✓ | ✓ | ✓ | N/A | N/A | N/A | N/A | ✓ | x | x | ✓ | 5 |
| Saeidi 2016 | ✓ | ✓ | x | x | N/A | N/A | N/A | ✓ | ✓ | N/A | ✓ | 5 |
| Singer 2012 | ✓ | ✓ | ✓ | ✓ | ✓ | N/A | ✓ | ✓ | ✓ | N/A | ✓ | 9 |

**eTable 4f. Risk of bias assessment using the JBI critical appraisal tool for qualitative studies**

Scoring: Yes = 1 point; No/Unclear/NA = 0 points. Rating: 8-10 points = low risk of bias; 6-7 = moderate risk of bias; <6 = high risk of bias.

| Study ID | 1. Congruity between the stated philosophical perspective and the research methodology | 2. Congruity between the research methodology and the research question or objectives | 3. Congruity between the research methodology and the methods used to collect data | 4. Congruity between the research methodology and the representation and analysis of data | 5. There is congruence between the research methodology and the interpretation of results | 6. Locating the researcher culturally or theoretically | 7. Influence of the researcher on the research, and vice-versa, is addressed | 8. Representation of participants and their voices | 9. Ethical approval by an appropriate body | 10. Relationship of conclusions to analysis, or interpretation of the data | Total |
| --- | --- | --- | --- | --- | --- | --- | --- | --- | --- | --- | --- |
| Labate 2011 | ✓ | ✓ | ✓ | ✓ | ✓ | x | x | ✓ | ? | ✓ | 7 |

**eTable 4g. Risk of bias assessment using the JBI critical appraisal tool for quasi-experimental studies**

Scoring: Yes = 1 point; No/Unclear/NA = 0 points. Rating: 7-9 points = low risk of bias; 5-6 = moderate risk of bias; <5 = high risk of bias.

| Study ID | 1. Is it clear in the study what is the “cause” and what is the “effect” (i.e. there is no confusion about which variable comes first)? | 2. Was there a control group? | 3. Were participants included in any comparisons similar? | 4. Were the participants included in any comparisons receiving similar treatment/care, other than the exposure or intervention of interest? | 5. Were there multiple measurements of the outcome, both pre and post the intervention/ exposure? | 6. Were the outcomes of participants included in any comparisons measured in the same way? | 7. Were outcomes measured in a reliable way? | 8. Was follow-up complete and if not, were differences between groups in terms of their follow-up adequately described and analyzed? | 9. Was appropriate statistical analysis used? | Total |
| --- | --- | --- | --- | --- | --- | --- | --- | --- | --- | --- |
| Leary 1963 | ✓ | x | N/A | N/A | x | ✓ | x | ✓ | N/A | 3 |

**eTable 5. Certainty assessment using the Grading of Recommendations, Assessment, Development, and Evaluation (GRADE) approach**

| **Outcome** | **Number of studies** | **Certainty** | **Comments** |
| --- | --- | --- | --- |
| Spontaneous abortions | 2 | ⨁◯◯◯‬ | Evidence from observational studies started at low certainty and downgraded for risk of bias |
| Maternal deaths | 0 | – | No studies reporting on maternal deaths |
| Stillbirth | 1 | ⨁◯◯◯‬ | Evidence from observational studies started at low certainty and downgraded for risk of bias and publication bias |
| Neonatal mortality | 16 | ⨁◯◯◯‬ | Evidence from observational studies started at low certainty and downgraded for risk of bias and publication bias |
| Preterm birth | 17 | ⨁◯◯◯‬ | Evidence from observational studies started at low certainty and downgraded for risk of bias and publication bias |
| Birthweight | 15 | ⨁◯◯◯‬ | Evidence from observational studies started at low certainty and downgraded for risk of bias and publication bias |
| Congenital malformations | 26 | ⨁◯◯◯‬ | Evidence from observational studies started at low certainty and downgraded for risk of bias and publication bias |

**eTable 6. Reported congenital malformations by category**

| **Study ID** | **Timing of exposure to psychedelic substances** | **Nervous system anomalies** | **Eye anomalies** | **Ear, face, and neck anomalies** | **Congenital heart defects** | **Respiratory anomalies** | **Oro-facial clefts** | **Gastro-intestinal anomalies** | **Abdominal wall defects:** | **Congenital anomalies of kidney and urinary tract (CAKUT)** | **Limb anomalies** | **Other anomalies and syndromes** | **Genetic disorders** |
| --- | --- | --- | --- | --- | --- | --- | --- | --- | --- | --- | --- | --- | --- |
| Aase 1970 | First trimester; second trimester; third trimester | No congenital malformation | | | | | | | | | | | |
| Apple 1974 | Not specified | Anencephaly | Coloboma of the iris, congenital cataract | - | - | - | Cleft lip and palate | - | - | - | Upper limb reduction defect, syndactyly | - | - |
| Assemany 1970 | Not specified | - | - | - | - | - | - | - | - | - | Reduction defect of the fingers, reduction defect of the toes | - | - |
| Bogdanoff 1972 | Not specified | Hydrocephaly | Micropthalmia | - | - | - | - | - | - | - | - | - | - |
| Carakushansky 1969 | Not specified | - | - | - | - | - | - | - | - | - | Syndactyly, reduction defects of fingers, congenital talipes equinovarus | - | Chromosomal anomaly  One chromosome 45,XX,G |
| Carter 1972 | Not specified | Exencephaly | - | - | - | - | Midfacial cleft | - | - | - | - | - | - |
| Chan 1978 | First trimester | - | Microphthalmia, congenital cataract | - | Coarctation of the aorta | - | - | Left-sided congenital diaphragmatic hernia | - | - | - | - | - |
| Cohen 1968 | First trimester; second trimester; third trimester | No congenital malformation | | | | | | | | | | | |
| Egozcue 1969 | First trimester; second trimester; third trimester | - | - | - | - | - | - | Hirschsprung’s disease | - |  | -- | - | - |
| Eller 1970 | First trimester; around time of conception | Neural tube defect, hydrocephalus, Arnold-Chiari malformation | - | - | - | - | - | Anorectal malformation (rectovesical fistula) | - | Horseshoe kidney, persistent urachus | Talipes equinovarus | - | - |
| Faria 1973 | First trimester | - | - | - | Ventricular septal defect | - | - | - | - | - | - | - | - |
| Gelehrter 1970 | First trimester | - | - | - | - | - | - | - | - | Bladder extrophy and epispadias | - | - | - |
| Giovannucci 1976 | Not specified | Neural tube defect (meningocoele), absence of cerebellar tonsils | Coloboma of iris (Q13 malformations of the anterior segment of the eye) | Absent external auditory canal, malformed auricles | Double outlet right ventricle (DORV) | Abnormal lobing of the lungs (Q33.8 Other congenital malformations of lung) | - | Anal atresia, rectal atresia with blind-ending sigmoid colon | - | Horseshoe kidney with single megaureter | Talipes equinovarus, webbing of toes | Genital anomalies- indeterminate sex, undescended testicle | - |
| Haden 2020 | First trimester | No congenital malformation | | | | | | | | | | | |
| Hoyt 1978 | First trimester; second trimester; third trimester | - | Bilateral optic nerve hypoplasia, bilateral colobomas of optic nerve | - | - | - | Cleft palate | - | - | - | - | - | - |
| Jacobson 1972 | First trimester; second trimester; third trimester | Meningocoele with hydrocephus, AV malformation of vein of Galen | - | - | Tetralogy of Fallot | - | - | - | - | - | Talipes equinovarus, bilateral absence of both feet (limb reduction defect), limb reduction defect of upper limb | - | - |
| Jeanbart 1971 | First trimester | - | - | - | - | - | - | - | - | - | Adactyly of fingers, syndactyly of fingers, absence of toes | - | - |
| Leary 1963 | Not specified | No congenital malformation | | | | | | | | | | | |
| Margolis 1980 | Not specified | - | Anophthalmia | - | - | - | - | - | - | - | - | - | - |
| Tenbrinck 1975 | First trimester | - | - | - | - | - | - | - | - | - | - | Genital: bilateral cryptorchidism (inguinal) | Chromosomal anomaly  Monosomy 21 "46,XY,-21,+ small metacentric." |
| Tenorio 1988 | First trimester; second trimester | - | Optic disk hypoplasia | - | - | - | - | - | - | - | - | - | - |
| Torfs 1994 | First trimester; pre-conceptional trimester | - | - | - | - | - | - | - | Gastroschisis | - | - | - | - |
| Van Tol 2009 | During labor | No congenital malformation | | | | | | | | | | | |
| Von Mandach 1999 | First trimester | No congenital malformation | | | | | | | | | | | |
| Warren 1970 | First trimester; second trimester | No congenital malformation | | | | | | | | | | | |
| Zellweger 1967 | First trimester; second trimester | - | - | - | - | - | - | - | - | - | Absence of fibula (reduction defect of lower limb) | - | - |
